# Supplementary material
Source: Springer Nature journal article supplement (https://www.springermedizin.de/resource/supplementary/12885_2012_3804_MOESM4_ESM.pdf/9464500)
Supplement: MOESM4 [file 9464500]

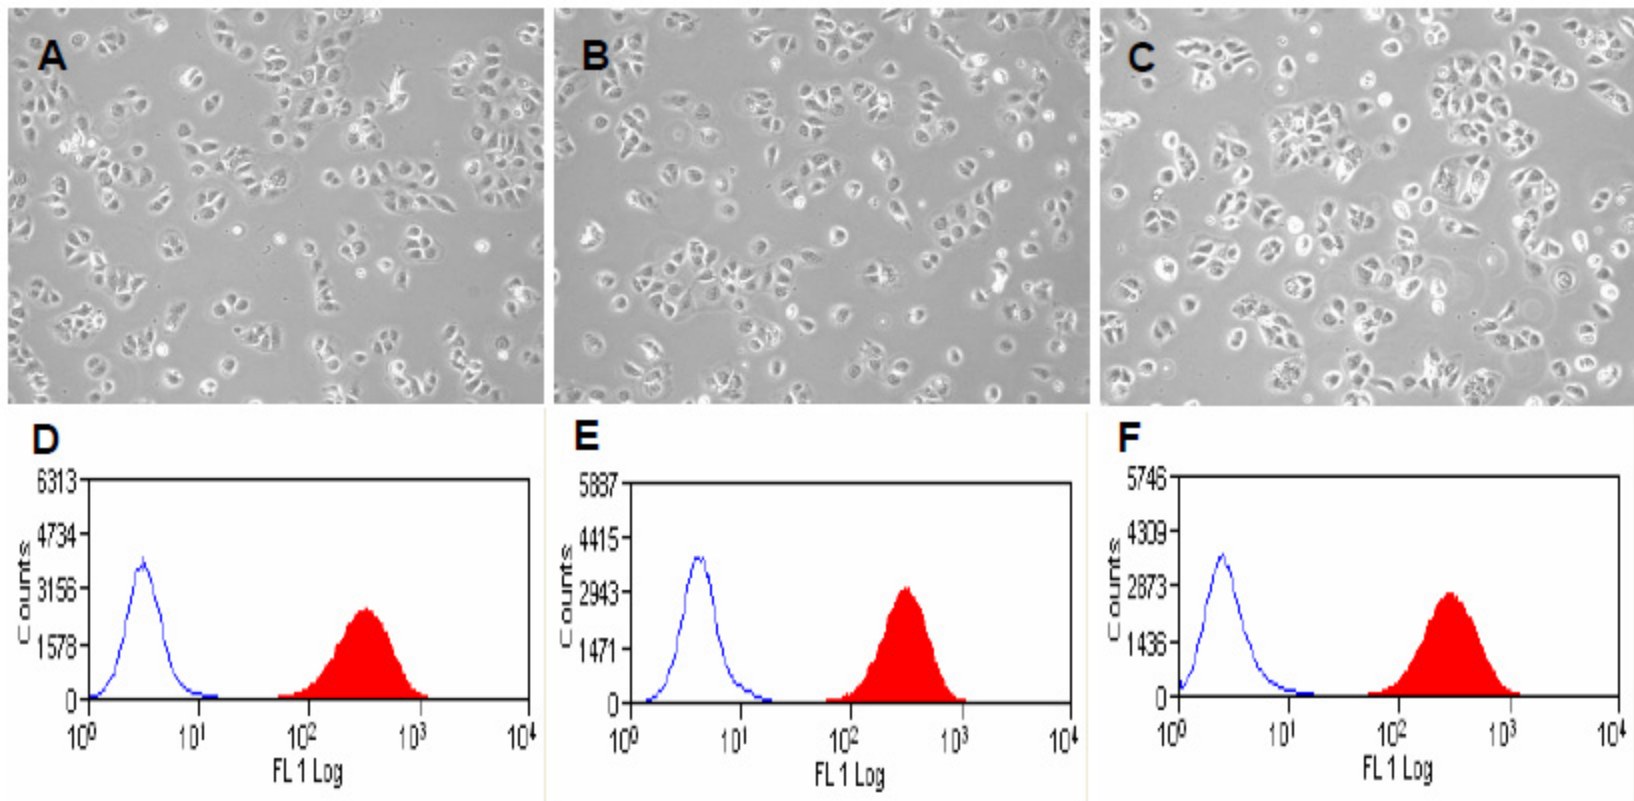

**Supplementary Figure 1 – *in vitro* control of new generated cell lines.** HUH-wt (A), HUH-PAS (B) and HUH-REISO (C) showed no differences in morphology by transmitted light microscopy. Moreover, in FACS analysis cells showed human origin as all cells of HUH-wt (D), HUH-PAS (E) and HUH-REISO (F) were positive in the staining for human epidermal growth factor receptor (hEGF-R), indicated by the shifted red curve in comparison to the correspondent control antibody (white curve).
